# Supplementary material for: Resolution of deep divergence of club fungi (phylum Basidiomycota)
Source: PubMed Central journal article supplement — Synth Syst Biotechnol. 2019 Dec 10;4(4):225–31. doi: 10.1016/j.synbio.2019.12.001 (PMC6926304; doi:10.1016/j.synbio.2019.12.001), 2019-12-10
Supplement: mmc1.pdf [file mmc1.pdf]

1 DESCRIPTION OF SUPPLEMENTARY FILES

2 *List of Supplementary datasets*

3 **Supplementary dataset 1:** Supermatrix of 171 gene clusters

4 **Supplementary dataset 2:** Supermatrix of non-missing-gene dataset

5 **Supplementary dataset 3:** Supermatrix of high alignment quality dataset

6 **Supplementary dataset 4:** Supermatrix of dataset with strong phylogenetic signal (average

7 BP  $\geq$  60%)

8 **Supplementary dataset 5:** Supermatrix of dataset with strong phylogenetic signal (average

9 BP  $\geq$  70%)

10

11 *Relationship between genome ID code used in Supplementary datasets 1-5 and species name*

| <b>Genome ID Code</b> | <b>Species Name</b>                                 |
|-----------------------|-----------------------------------------------------|
| a_7                   | <i>Aplosporella prunicola</i>                       |
| a_97                  | <i>Pyrenophora tritici-repentis</i>                 |
| a_105                 | <i>Saitoella complicata</i>                         |
| a_130                 | <i>Agaricus bisporus bisporus H97</i>               |
| a_131                 | <i>Agaricus bisporus burnettii JB137-s8</i>         |
| a_132                 | <i>Amanita muscaria</i>                             |
| a_133                 | <i>Amanita thiersii</i>                             |
| a_134                 | <i>Auricularia subglabra</i>                        |
| a_135                 | <i>Bjerkandera adusta</i>                           |
| a_136                 | <i>Boletus edulis</i>                               |
| a_137                 | <i>Botryobasidium botryosum</i>                     |
| a_138                 | <i>Ceriporiopsis subvermispota</i>                  |
| a_139                 | <i>Cerrena unicolor</i>                             |
| a_140                 | <i>Coniophora puteana</i>                           |
| a_141                 | <i>Coprinopsis cinerea</i>                          |
| a_142                 | <i>Cronartium quercuum</i>                          |
| a_143                 | <i>Cryptococcus neoformans var neoformans JEC21</i> |
| a_144                 | <i>Cryptococcus neoformans var. grubii H99</i>      |
| a_145                 | <i>Cryptococcus vishniacii</i>                      |
| a_146                 | <i>Dacryopinax sp. DJM 731 SSP1</i>                 |
| a_147                 | <i>Daedalea quercina</i>                            |
| a_148                 | <i>Dichomitus squalens</i>                          |
| a_149                 | <i>Dioszegia cryoxerica</i>                         |

|       |                                       |
|-------|---------------------------------------|
| a_150 | <i>Fistulina hepatica</i>             |
| a_151 | <i>Fomitiporia mediterranea</i>       |
| a_152 | <i>Fomitopsis pinicola</i>            |
| a_153 | <i>Galerina marginata</i>             |
| a_154 | <i>Ganoderma sp. 10597 SS1</i>        |
| a_155 | <i>Gloeophyllum trabeum</i>           |
| a_156 | <i>Gymnopus luxurians</i>             |
| a_157 | <i>Hebeloma cylindrosporum</i>        |
| a_158 | <i>Heterobasidion irregulare</i>      |
| a_159 | <i>Hydnomerulius pinastri</i>         |
| a_160 | <i>Hypholoma sublateritium</i>        |
| a_161 | <i>Jaapia argillacea</i>              |
| a_162 | <i>Laccaria amethystina</i>           |
| a_163 | <i>Laccaria bicolor</i>               |
| a_164 | <i>Laetiporus sulphureus</i>          |
| a_165 | <i>Malassezia globosa</i>             |
| a_166 | <i>Melampsora laricis-populina</i>    |
| a_167 | <i>Mixia osmundae</i>                 |
| a_168 | <i>Neolentinus lepideus</i>           |
| a_169 | <i>Paxillus involutus</i>             |
| a_170 | <i>Paxillus rubicundulus</i>          |
| a_171 | <i>Phanerochaete carnosae</i>         |
| a_172 | <i>Phanerochaete chrysosporium</i>    |
| a_173 | <i>Phlebia brevispora</i>             |
| a_174 | <i>Phlebiopsis gigantea</i>           |
| a_175 | <i>Piloderma croceum</i>              |
| a_176 | <i>Piriformospora indica</i>          |
| a_177 | <i>Pisolithus microcarpus</i>         |
| a_178 | <i>Pisolithus tinctorius</i>          |
| a_179 | <i>Pleurotus ostreatus PC15</i>       |
| a_180 | <i>Pleurotus ostreatus PC9</i>        |
| a_181 | <i>Plicaturopsis crispa</i>           |
| a_182 | <i>Polyporus arcularius</i>           |
| a_184 | <i>Postia placenta MAD-698-R-SB12</i> |
| a_185 | <i>Puccinia graminis</i>              |
| a_186 | <i>Punctularia strigosozonata</i>     |
| a_187 | <i>Rhodotorula graminis</i>           |
| a_188 | <i>Schizophyllum commune</i>          |
| a_189 | <i>Scleroderma citrinum</i>           |
| a_190 | <i>Sebacina vermifera</i>             |
| a_191 | <i>Serpula lacrymans S7.3</i>         |
| a_192 | <i>Serpula lacrymans S7.9</i>         |
| a_193 | <i>Serpula lacrymans-shastensis</i>   |
| a_194 | <i>Sphaerobolus stellatus</i>         |
| a_195 | <i>Sporobolomyces roseus</i>          |

|       |                                       |
|-------|---------------------------------------|
| a_196 | <i>Stereum hirsutum</i>               |
| a_197 | <i>Suillus luteus</i>                 |
| a_198 | <i>Trametes versicolor</i>            |
| a_199 | <i>Tremella mesenterica</i>           |
| a_200 | <i>Tulasnella calospora</i>           |
| a_201 | <i>Ustilago maydis</i>                |
| a_203 | <i>Wolfiporia cocos</i>               |
| a_204 | <i>cryptococcus gattii r265</i>       |
| a_205 | <i>cryptococcus gattii wm276</i>      |
| a_206 | <i>Exobasidium vaccinii</i>           |
| a_207 | <i>Malassezia sympodialis</i>         |
| a_208 | <i>Pseudozyma antarctica</i>          |
| a_209 | <i>Pseudozyma hubeiensis</i>          |
| a_210 | <i>Sporisorium reilianum</i>          |
| a_211 | <i>Tilletiaria anomala</i>            |
| a_212 | <i>Atractiellales sp.</i>             |
| a_213 | <i>Puccinia striiformis</i>           |
| a_214 | <i>Agaricostilbum hyphaenes</i>       |
| a_215 | <i>Heterogastridium pycnidioideum</i> |
| a_216 | <i>Naiadella fluitans</i>             |
| a_217 | <i>Rhodotorula minuta</i>             |
| a_218 | <i>Tritirachium sp. CBS 265.96</i>    |
| a_219 | <i>Sporobolomyces linderiae</i>       |

1

2 *List of Supplementary Tables*

3 **Table S1:** Information of 91 fungal genomes investigated in this study

4 **Table S2:** Domain structure and conservation of 171 gene clusters

5 **Table S3:** Enrichment analysis of functional categories of 78 gene clusters that have single-copy  
6 orthologs in yeast genome

7 **Table S4:** Approximately Unbiased test of relationships between the three subphyla

8 **Table S5:** Other tests of relationships between the three subphyla using CONSEL

9 **Table S6:** Gene cluster removal in the evaluation of potential sequence bias

10 **Table S7:** Stability of relationships between the three subphyla in CVTree

11

12 *Supplementary Figure Legends*

1 **Figure S1:** Distribution of peptide length of 171 gene clusters.

2 **Figure S2:** Functional categories of 171 gene clusters. (a-c) Bar chart of GO annotation in the  
3 domain of Biological Process, Cellular Component and Molecular Function. SeqNr denotes the  
4 number of sequences which have annotated hits in the nr database.

5 **Figure S3:** ML phylogeny of 91 fungal genomes using 171 single-copy gene clusters. This tree  
6 is constructed using LG+G+I+F model. Values on branches denote bootstrap support.

7 **Figure S4:** NJ phylogeny of 91 fungal genomes using 171 single-copy gene clusters. This tree is  
8 constructed using JTT+G model. Values on branches denote bootstrap support.

9 **Figure S5:** MP phylogeny of 91 fungal genomes using 171 single-copy gene clusters. Tree  
10 searching method used here is Subtree-Pruning-Regrafting. Values on branches denote bootstrap  
11 support.

12 **Figure S6:** Bayesian phylogeny of 91 fungal genomes using 171 single-copy gene clusters. This  
13 tree is constructed using WAG+I+G model. Values on branches denote posterior probability.

14 **Figure S7:** Full majority rule consensus tree of 91 fungal genomes. This tree is consensus of  
15 phylogeny showed in Figure S3-S6.

16 **Figure S8:** ML phylogeny derived from the non-missing-gene dataset. This tree is constructed  
17 using LG+G model. Values on branches denote bootstrap support.

18 **Figure S9:** ML phylogeny derived from the high alignment quality dataset. This tree is  
19 constructed using LG+G+I+F model. Values on branches denote bootstrap support.

20 **Figure S10:** ML phylogeny derived from the dataset with strong phylogenetic signal (average  
21 BP  $\geq$  60%). This tree is constructed using LG+G+I+F model. Values on branches denote  
22 bootstrap support.

23 **Figure S11:** ML phylogeny derived from the dataset with strong phylogenetic signal (average

1 BP  $\geq 70\%$ ). This tree is constructed using LG+G+I+F model. Values on branches denote  
2 bootstrap support.

3 **Figure S12:** Distribution of indices that indicate sequence bias. (a) Density plot of average upper  
4 quartile of LB score of gene clusters. Here threshold = 60 represent a stringent criterion. (2)  
5 Density plot of average upper quartile of LB score of gene clusters. Here threshold = 70  
6 represent a loose criterion. (c) Density plot of standard deviation of LB score of gene clusters  
7 (threshold = 50). (d) Density plot of  $R^2$  of linear regression between patristic and uncorrected  
8 distances of gene clusters. Here threshold = 0.65 represent a stringent criterion. (e) Density plot  
9 of  $R^2$  of linear regression between patristic and uncorrected distances (threshold = 0.3) of gene  
10 clusters. Here threshold = 0.3 represent a loose criterion. (f) Density plot of slope of the linear  
11 regression between patristic and uncorrected pairwise distances (threshold = 0.1) of gene  
12 clusters.

13 **Figure S13:** ML phylogenies derived from datasets after removal of gene clusters that  
14 potentially introduce sequence bias. All trees were constructed using LG+G+I+F model. Values  
15 on branches denote bootstrap support. (a) Phylogeny derived from the dataset by discarding gene  
16 clusters with high mean value of LB score (threshold = 60). (b) Phylogeny derived from the  
17 dataset by discarding gene clusters with high mean value of LB score (threshold = 70). (c)  
18 Phylogeny derived from the dataset by discarding gene clusters with high standard deviation of  
19 LB score (threshold = 50). (d) Phylogeny derived from the dataset by discarding gene clusters  
20 with high mean value of LB score (threshold = 70) or high standard deviation of LB score  
21 (threshold = 50). (e) Phylogeny derived from the dataset by discarding gene clusters with low  
22 slope value (threshold = 0.1). (f) ML phylogeny derived from the dataset by discarding gene  
23 clusters with low  $R^2$  value (threshold = 0.3). (g) Phylogeny derived from the dataset by

1 discarding gene clusters with low  $R^2$  value (threshold = 0.65). (h) Phylogeny derived from the  
2 dataset by discarding gene clusters with low  $R^2$  value (threshold = 0.3) or low slope value  
3 (threshold = 0.1). (i) Phylogeny derived from the dataset by discarding gene clusters with low  $R^2$   
4 value (threshold = 0.65) or low slope value (threshold = 0.1). (j) Phylogeny derived from the  
5 dataset by discarding gene clusters with low  $R^2$  value (threshold = 0.65) or high mean value of  
6 LB score (threshold = 60) or low slope value (threshold = 0.1).

7 **Figure S14:** Full CVTree of 91 fungal genomes using their whole-gene repertoires.
