# Supplementary material for: Resolution of deep divergence of club fungi (phylum Basidiomycota)
Source: PubMed Central journal article supplement — Synth Syst Biotechnol. 2019 Dec 10;4(4):225–31. doi: 10.1016/j.synbio.2019.12.001 (PMC6926304; doi:10.1016/j.synbio.2019.12.001), 2019-12-10
Supplement: mmc4.pdf [file mmc4.pdf]

**Table S1:** Information of 91 fungal genomes investigated in this study

| <b>Species name</b>                                 | <b>Subphylum</b> | <b>Source</b>   |
|-----------------------------------------------------|------------------|-----------------|
| <i>Agaricus bisporus bisporus H97</i>               | Agaricomycotina  | JGI             |
| <i>Agaricus bisporus burnettii JB137-s8</i>         | Agaricomycotina  | JGI             |
| <i>Amanita muscaria</i>                             | Agaricomycotina  | JGI             |
| <i>Amanita thiersii</i>                             | Agaricomycotina  | JGI             |
| <i>Auricularia subglabra</i>                        | Agaricomycotina  | JGI             |
| <i>Bjerkandera adusta</i>                           | Agaricomycotina  | JGI             |
| <i>Boletus edulis</i>                               | Agaricomycotina  | JGI             |
| <i>Botryobasidium botryosum</i>                     | Agaricomycotina  | JGI             |
| <i>Ceriporiopsis subvermispora</i>                  | Agaricomycotina  | JGI             |
| <i>Cerrena unicolor</i>                             | Agaricomycotina  | JGI             |
| <i>Coniophora puteana</i>                           | Agaricomycotina  | JGI             |
| <i>Coprinopsis cinerea</i>                          | Agaricomycotina  | JGI             |
| <i>cryptococcus gattii r265</i>                     | Agaricomycotina  | Broad Institute |
| <i>cryptococcus gattii wm276</i>                    | Agaricomycotina  | Broad Institute |
| <i>Cryptococcus neoformans var neoformans JEC21</i> | Agaricomycotina  | JGI             |
| <i>Cryptococcus neoformans var. grubii H99</i>      | Agaricomycotina  | JGI             |
| <i>Cryptococcus vishniacii</i>                      | Agaricomycotina  | JGI             |
| <i>Dacryopinax sp. DJM 731 SSP1</i>                 | Agaricomycotina  | JGI             |
| <i>Daedalea quercina</i>                            | Agaricomycotina  | JGI             |
| <i>Dichomitus squalens</i>                          | Agaricomycotina  | JGI             |
| <i>Dioszegia cryoxerica</i>                         | Agaricomycotina  | JGI             |
| <i>Fistulina hepatica</i>                           | Agaricomycotina  | JGI             |
| <i>Fomitiporia mediterranea</i>                     | Agaricomycotina  | JGI             |
| <i>Fomitopsis pinicola</i>                          | Agaricomycotina  | JGI             |
| <i>Galerina marginata</i>                           | Agaricomycotina  | JGI             |
| <i>Ganoderma sp. 10597 SS1</i>                      | Agaricomycotina  | JGI             |
| <i>Gloeophyllum trabeum</i>                         | Agaricomycotina  | JGI             |
| <i>Gymnopus luxurians</i>                           | Agaricomycotina  | JGI             |
| <i>Hebeloma cylindrosporum</i>                      | Agaricomycotina  | JGI             |
| <i>Heterobasidion irregulare</i>                    | Agaricomycotina  | JGI             |
| <i>Hydnomerulius pinastri</i>                       | Agaricomycotina  | JGI             |
| <i>Hypholoma sublateritium</i>                      | Agaricomycotina  | JGI             |
| <i>Jaapia argillacea</i>                            | Agaricomycotina  | JGI             |
| <i>Laccaria amethystina</i>                         | Agaricomycotina  | JGI             |
| <i>Laccaria bicolor</i>                             | Agaricomycotina  | JGI             |

|                                       |                  |     |
|---------------------------------------|------------------|-----|
| <i>Laetiporus sulphureus</i>          | Agaricomycotina  | JGI |
| <i>Neolentinus lepideus</i>           | Agaricomycotina  | JGI |
| <i>Paxillus involutus</i>             | Agaricomycotina  | JGI |
| <i>Paxillus rubicundulus</i>          | Agaricomycotina  | JGI |
| <i>Phanerochaete carnosa</i>          | Agaricomycotina  | JGI |
| <i>Phanerochaete chrysosporium</i>    | Agaricomycotina  | JGI |
| <i>Phlebia brevispora</i>             | Agaricomycotina  | JGI |
| <i>Phlebiopsis gigantea</i>           | Agaricomycotina  | JGI |
| <i>Piloderma croceum</i>              | Agaricomycotina  | JGI |
| <i>Piriformospora indica</i>          | Agaricomycotina  | JGI |
| <i>Pisolithus microcarpus</i>         | Agaricomycotina  | JGI |
| <i>Pisolithus tinctorius</i>          | Agaricomycotina  | JGI |
| <i>Pleurotus ostreatus PC15</i>       | Agaricomycotina  | JGI |
| <i>Pleurotus ostreatus PC9</i>        | Agaricomycotina  | JGI |
| <i>Plicaturopsis crispa</i>           | Agaricomycotina  | JGI |
| <i>Polyporus arcularius</i>           | Agaricomycotina  | JGI |
| <i>Postia placenta MAD-698-R-SB12</i> | Agaricomycotina  | JGI |
| <i>Punctularia strigosozonata</i>     | Agaricomycotina  | JGI |
| <i>Schizophyllum commune</i>          | Agaricomycotina  | JGI |
| <i>Scleroderma citrinum</i>           | Agaricomycotina  | JGI |
| <i>Sebacina vermifera</i>             | Agaricomycotina  | JGI |
| <i>Serpula lacrymans S7.3</i>         | Agaricomycotina  | JGI |
| <i>Serpula lacrymans S7.9</i>         | Agaricomycotina  | JGI |
| <i>Serpula lacrymans-shastensis</i>   | Agaricomycotina  | JGI |
| <i>Sphaerobolus stellatus</i>         | Agaricomycotina  | JGI |
| <i>Stereum hirsutum</i>               | Agaricomycotina  | JGI |
| <i>Suillus luteus</i>                 | Agaricomycotina  | JGI |
| <i>Trametes versicolor</i>            | Agaricomycotina  | JGI |
| <i>Tremella mesenterica</i>           | Agaricomycotina  | JGI |
| <i>Tulasnella calospora</i>           | Agaricomycotina  | JGI |
| <i>Wolfiporia cocos</i>               | Agaricomycotina  | JGI |
| <i>Agaricostilbum hyphaenes</i>       | Pucciniomycotina | JGI |
| <i>Atractiellales sp</i>              | Pucciniomycotina | JGI |
| <i>Cronartium quercuum</i>            | Pucciniomycotina | JGI |
| <i>Heterogastridium pycnidioideum</i> | Pucciniomycotina | JGI |
| <i>Melampsora laricis-populina</i>    | Pucciniomycotina | JGI |
| <i>Mixia osmundae</i>                 | Pucciniomycotina | JGI |

|                                     |                    |     |
|-------------------------------------|--------------------|-----|
| <i>Naiadella fluitans</i>           | Pucciniomycotina   | JGI |
| <i>Puccinia graminis</i>            | Pucciniomycotina   | JGI |
| <i>Puccinia striiformis</i>         | Pucciniomycotina   | JGI |
| <i>Rhodotorula graminis</i>         | Pucciniomycotina   | JGI |
| <i>Rhodotorula minuta</i>           | Pucciniomycotina   | JGI |
| <i>Sporobolomyces linderæ</i>       | Pucciniomycotina   | JGI |
| <i>Sporobolomyces roseus</i>        | Pucciniomycotina   | JGI |
| <i>Tritirachium sp. CBS 265.96</i>  | Pucciniomycotina   | JGI |
| <i>Exobasidium vaccinii</i>         | Ustilaginomycotina | JGI |
| <i>Malassezia globosa</i>           | Ustilaginomycotina | JGI |
| <i>Malassezia sympodialis</i>       | Ustilaginomycotina | JGI |
| <i>Pseudozyma antarctica</i>        | Ustilaginomycotina | JGI |
| <i>Pseudozyma hubeiensis</i>        | Ustilaginomycotina | JGI |
| <i>Sporisorium reilianum</i>        | Ustilaginomycotina | JGI |
| <i>Tilletiaria anomala</i>          | Ustilaginomycotina | JGI |
| <i>Ustilago maydis</i>              | Ustilaginomycotina | JGI |
| <i>Aplosporella prunicola</i>       | Ascomycota         | JGI |
| <i>Pyrenophora tritici-repentis</i> | Ascomycota         | JGI |
| <i>Saitoella complicata</i>         | Ascomycota         | JGI |

**Table S2:** Domain structure and conservation of 171 gene clusters

| Cluster ID | # of Domain detected | GeneID in original genome annotations                         | Domain Structure                  |                                      | Best BLAST hit in NR                                  | Occur in plants or animals |
|------------|----------------------|---------------------------------------------------------------|-----------------------------------|--------------------------------------|-------------------------------------------------------|----------------------------|
|            |                      |                                                               | Profile IDs from N' to C'         | Domain Names from N' to C'           |                                                       |                            |
| group_1    | 1                    | jgi Rhoba1_1 3746 gw1.3.293.1                                 | PF00466.15                        | Ribosomal_L10                        | mRNA turnover protein 4                               | TRUE                       |
| group_2    | 1                    | jgi Spoli1 204666 fgenes1_pm.3_#_201                          | PF06068.8                         | TIP49                                | RuvB-like protein 2                                   | TRUE                       |
| group_3    | 1                    | jgi Cryne_H99_1 2024 CNAG_02236T0                             | PF00149.23                        | Metallophos                          | serine/threonine-protein phosphatase                  | TRUE                       |
| group_4    | 2                    | jgi Malsy1_1 3204 MSY001_1846m.01                             | PF04194.8;PF02219.12              | PDCD2_C;MTHFR                        | MET12-methylenetetrahydrofolate reductase             | FALSE                      |
| group_5    | 1                    | jgi Fishe1 54650 e_gw1.574.92.1                               | PF00004.24                        | AAA                                  | 26S subunit, ATPase, 1                                | TRUE                       |
| group_6    | 2                    | PTRG_00048                                                    | PF01602.15;PF13646.1              | Adaptin_N;HEAT_2                     | protein phosphatase PP2A regulatory subunit A         | TRUE                       |
| group_7    | 1                    | jgi SerlaS7_3_2 175548 estExt_fgenes1_kg.C_21_024             | PF00677.12                        | Lum_binding                          | riboflavin synthase alpha chain                       | FALSE                      |
| group_8    | 3                    | jgi Jaaar1 79123 estExt_fgenes1_pg.C_130037                   | PF04669.8;PF04821.9;PF05029.8;    | Polysacc_synt_4;TIMELESS;TIMELESS_C; | duf757 domain-containing protein                      | FALSE                      |
| group_9    | 2                    | jgi Schco3 2624702 fgenes1_kg.5_#_4142_#_Locus899v1rpkm215.08 | PF00226.26;PF02889.11;            | DnaJ;Sec63;                          | Null <sup>1</sup>                                     | FALSE                      |
| group_10   | 2                    | jgi Pucgr1 22361 PGTT_01827                                   | PF03483.12;PF03484.10;            | B3_4;B5;                             | phenylalanyl-tRNA synthetase beta subunit             | FALSE                      |
| group_11   | 1                    | jgi Psehu1 2208 PHSY_002881m.01                               | PF09139.6                         | Mmp37                                | mmp37-domain-containing protein                       | FALSE                      |
| group_12   | 3                    | jgi Phlbr1 30713 fgenes1_kg.34_#_4_#_isotig08860              | PF00483.18;PF00132.19;PF02020.13; | NTP_transferase;Hexapep;W2;          | translation initiation factor eif-2b subunit epsilon  | FALSE                      |
| group_13   | 2                    | jgi Phlbr1 30713 fgenes1_kg.34_#_4_#_isotig08860              | PF10584.4;PF00227.21              | Proteasome_A_N;Proteasome;           | PSMA7 protein                                         | TRUE                       |
| group_14   | 1                    | jgi Hypsu1 944453 CE723447_12297                              | PF01189.12                        | Nol1_Nop2_Fmu                        | tRNA (cytosine-5-)-methyltransferase NCL1             | FALSE                      |
| group_15   | 1                    | jgi Travel1 174957 estExt_Genewise1Plus.C_13_t2_0147          | PF00735.13                        | Septin                               | cell division control protein 12                      | FALSE                      |
| group_16   | 2                    | jgi Hebcy2 439117 fgenes1_kg.2_#_59_#_Locus612v1rpkm112.82    | PF01012.16;PF00766.14;            | ETF;ETF_alpha;                       | electron transfer flavoprotein subunit alpha          | FALSE                      |
| group_17   | 1                    | jgi Treme1 41792 estExt_Genewise1Plus.C_10962                 | PF00153.22                        | Mito_carr                            | calcium-binding mitochondrial carrier protein Aralar1 | FALSE                      |
| group_18   | 2                    | jgi Aplpr1 305724 fgenes1_pg.4_#_376                          | PF00270.24;PF00271.26;            | DEAD;Helicase_C;                     | DEAD/DEAH box RNA helicase                            | FALSE                      |

|          |   |                                                             |                                                                    |                                                           |                                                                       |       |
|----------|---|-------------------------------------------------------------|--------------------------------------------------------------------|-----------------------------------------------------------|-----------------------------------------------------------------------|-------|
| group_19 | 1 | jgi Cryne_H99_1 4184 CNAG_04651T0                           | PF02077.10                                                         | SURF4                                                     | SURF4 family protein                                                  | FALSE |
| group_20 | 1 | jgi SerlaS7_3_2 99496 estExt_Genewise1.C_360012             | PF04280.10                                                         | Tim44                                                     | related to TIM44-mitochondrial inner membrane import receptor subunit | FALSE |
| group_21 | 1 | jgi Cryne_JEC21_1 4487 CNE03090.t01                         | PF10609.4                                                          | ParA                                                      | cytosolic Fe-S cluster assembly factor nbp35                          | TRUE  |
| group_22 | 1 | jgi Glotr1_1 119689 estExt_fgenesh1_pg.C_00002_t20141       | PF00400.27                                                         | WD40                                                      | set1 complex component swd1                                           | FALSE |
| group_23 | 3 | jgi Mixos1 77705 estExt_Genewise1Plus.C_9_t10153            | PF13774.1;PF00957.16;PF01553.16;                                   | Longin;Synaptobrevin;Acyltransferase;                     | transport protein sec22                                               | FALSE |
| group_24 | 1 | jgi Hebcy2 440383 fgenesh1_kg.3_#_157_#_Locus5798v1rpkm8.46 | PF01926.18                                                         | MMR_HSR1                                                  | mitochondrial gtpase                                                  | FALSE |
| group_25 | 2 | jgi Aplpr1 262865 estExt_Genewise1Plus.C_2_t20225           | PF04045.9;PF00565.12;                                              | P34-Arc;Snase;                                            | ARP2/3 complex 34 kDa subunit                                         | FALSE |
| group_26 | 2 | jgi Pucst1 493332 maker-PST130_20759-snap-gene-0.12-mRNA-1  | PF01172.13;PF09377.5;                                              | SBDS;SBDS_C;                                              | null                                                                  | FALSE |
| group_27 | 6 | jgi Ustma1 3490 UM03490                                     | PF00069.20;PF01237.13;PF00160.16;PF00076.17;PF00654.15;PF00571.23; | Pkinase;Oxysterol_BP;Pro_isomerase;RRM_1;Voltage_CLC;CBS; | CLC voltage-gated chloride channel                                    | FALSE |
| group_28 | 3 | jgi Saico1 79558 estExt_Genewise1.C_100050                  | PF13207.1;PF08142.7;PF04950.7;                                     | AAA_17;AARP2CN;DUF663;                                    | ribosome biogenesis protein BMS1                                      | FALSE |
| group_29 | 1 | jgi Fompi3 1162809 estExt_Genewise1Plus.C_260253            | PF00400.27                                                         | WD40                                                      | U4/U6 small nuclear ribonucleoprotein Prp4                            | FALSE |
| group_30 | 3 | jgi Rhomi1 112433 CE112432_5887                             | PF03105.14;PF09359.5;PF02656.10;                                   | SPX;VTC;DUF202;                                           | vacuolar transporter chaperone 4                                      | FALSE |
| group_31 | 1 | jgi Sporo1 27320 fgenesh1_pg.C_scaffold_5000209             | PF00022.14                                                         | Actin                                                     | actin-related protein 8                                               | FALSE |
| group_32 | 1 | jgi Gansp1 121666 fgenesh1_kg.10_#_446_#_isotig12297        | PF02466.14                                                         | Tim17                                                     | mitochondrial import inner membrane translocase subunit tim22         | FALSE |
| group_33 | 2 | jgi Aplpr1 218091 e_gw1.1.156.1                             | PF03901.12;PF11927.3;                                              | Glyco_transf_22;DUF3445;                                  | alpha-1,2-mannosyltransferase                                         | FALSE |
| group_34 | 2 | jgi Fompi3 1148592 estExt_Genewise1.C_430037                | PF01137.16;PF05189.8;                                              | RTC;RTC_insert;                                           | RNA 3'-terminal phosphate cyclase                                     | FALSE |
| group_35 | 2 | jgi Mixos1 47766 e_gw1.4.54.1                               | PF00428.14;PF13489.1;                                              | Ribosomal_60s;Methyltransf_23;                            | hexaprenyldihydroxybenzoate methyltransferase                         | FALSE |
| group_36 | 1 | jgi Aplpr1 226223 e_gw1.10.2.1                              | PF10354.4                                                          | DUF2431                                                   | null                                                                  | FALSE |
| group_37 | 1 | jgi Sporo1 3876 gw1.6.318.1                                 | PF03152.9                                                          | UFD1                                                      | ubiquitin fusion degradation protein                                  | FALSE |
| group_38 | 2 | jgi SerlaS7_3_2 170214 estExt_fgenesh1_pm.C_100249          | PF00400.27;PF10294.4;                                              | WD40;Methyltransf_16;                                     | WD40 repeat-like protein                                              | FALSE |

|          |   |                                                                 |                                                      |                                   |                                                    |       |
|----------|---|-----------------------------------------------------------------|------------------------------------------------------|-----------------------------------|----------------------------------------------------|-------|
| group_39 | 3 | jgi Glotr1_1 71297 estExt_Genewise1Plus.C_00002_t40499          | PF08156.8;PF08060.8;PF01798.13;                      | NOP5NT;NOSIC;Nop;                 | NOP58 protein                                      | TRUE  |
| group_40 | 2 | jgi Mixos1 619488 MIX15280_34319_52                             | PF00153.22; PF08449.6;                               | Mito_carr;UAA;                    | null                                               | FALSE |
| group_41 | 1 | jgi Malsy1_1 2393 MSY001_1044m.01                               | PF01920.15                                           | Prefoldin_2                       | Gim complex component GIM4                         | FALSE |
| group_42 | 1 | jgi Pilcr1 813691 fgenes1_kg.00007_#_228_#_Locus2724v1rpkm76.72 | PF00071.17                                           | Ras                               | small GTP binding protein RAB5                     | TRUE  |
| group_43 | 3 | jgi Plicr1 40112 fgenes1_kg.6_#_398_#_Locus3522v1rpkm49.31      | PF13855.1;PF14580.1;PF12799.2;                       | LRR_8;LRR_9;LRR_4;                | protein phosphatases PP1 regulatory subunit sds22  | FALSE |
| group_44 | 1 | jgi Laesu1 738167 fgenes1_pm.38_#_25                            | PF00071.17                                           | Ras                               | protein-L-isoaspartate O-methyltransferase         | FALSE |
| group_45 | 2 | jgi Ustma1 2848 UM02848                                         | PF00179.21;PF01135.14;                               | UQ_con;PCMT;                      | NEDD8-conjugating enzyme UBC12                     | FALSE |
| group_46 | 1 | jgi Lacbi2 448332 gm1.12776_g                                   | PF00810.13                                           | ER_lumen_recept                   | ER lumen protein retaining receptor                | FALSE |
| group_47 | 1 | jgi Cryne_H99_1 1465 CNAG_01638T0                               | PF02301.13                                           | HORMA                             | mitotic spindle checkpoint protein                 | FALSE |
| group_48 | 2 | jgi Pilcr1 5570 gm1.5570_g                                      | PF00270.24;PF00271.26                                | DEAD;Helicase_C;                  | DEAD-box ATP-dependent RNA helicase                | TRUE  |
| group_49 | 1 | jgi Lacbi2 581744 e_gw1.2.4868.1                                | PF01269.12                                           | Fibrillarin                       | rRNA 2'-O-methyltransferase fibrillarin            | TRUE  |
| group_51 | 1 | jgi Cryne_H99_1 4293 CNAG_04765T0                               | PF04062.9                                            | P21-Arc                           | ARP2/3 complex 21 kDa subunit                      | FALSE |
| group_52 | 1 | jgi Agabi_varbur_1 55377 estExt_Genewise1.C_31323               | PF12171.3                                            | zf-C2H2_jaz                       | zinc finger protein                                | FALSE |
| group_53 | 2 | jgi Phlbr1 142945 gm1.631_g                                     | PF00248.16;PF00542.14;                               | Aldo_ket_red;Ribosomal_L12;       | 50S ribosomal protein L12                          | FALSE |
| group_54 | 1 | jgi SerlaS7_3_2 53296 e_gw1.6.1819.1                            | PF03850.9                                            | Tfb4                              | rna polymerase ii transcription factor b subunit 4 | FALSE |
| group_55 | 2 | jgi Psehu1 1058 PHSY_001757m.01                                 | PF00076.17;PF13499.1;                                | RRM_1;EF-hand_7;                  | SSP120-secretory protein                           | FALSE |
| group_56 | 1 | jgi Sphst1 46786 fgenes1_pg.36_#_250                            | PF14580.1                                            | LRR_9                             | U2 small nuclear ribonucleoprotein A'              | FALSE |
| group_57 | 1 | jgi Cryne_H99_1 4718 CNAG_05241T0                               | PF01423.17                                           | LSM                               | U6 snRNA-associated Sm-like protein LSM7           | TRUE  |
| group_58 | 2 | jgi Treme1 32917 e_gw1.9.265.1                                  | PF14259.1;PF13893.1;                                 | RRM_6;RRM_5;                      | Splicing factor U2AF-associated protein 2          | FALSE |
| group_59 | 5 | jgi Sebve1 20807 gm1.2079_g                                     | PF01423.17;PF08839.6;PF00270.24;PF00271.26;PF09369.5 | LSM;CDT1;DEAD;Helicase_C;DUF1998; | P-loop nucleoside triphosphate hydrolase           | FALSE |
| group_60 | 2 | jgi Psehu1 4814 PHSY_005286m.01                                 | PF00226.26;PF07743.8;                                | DnaJ;HSCB_C;                      | co-chaperone Hsc20                                 | FALSE |

|          |   |                                                                |                        |                              |                                                          |       |
|----------|---|----------------------------------------------------------------|------------------------|------------------------------|----------------------------------------------------------|-------|
| group_61 | 1 | jgi Hebcy2 439853 fgenes1_kg.2_#_795_#_Locus7028v7rpkm0.40_PRE | PF01398.16             | JAB                          | translation initiation factor 3 subunit 3                | FALSE |
| group_62 | 1 | jgi Tulca1 243742 fgenes1_kg.84_#_4_#_Locus405v1rpkm965.62     | PF00179.21             | UQ_con                       | Protein UBC-14                                           | FALSE |
| group_63 | 1 | jgi Dacsp1 72045 estExt_Genewise1.C_220369                     | PF00025.16             | Arf                          | ADP-ribosylation factor A1E                              | TRUE  |
| group_64 | 2 | jgi Malsy1_1 513 MSY001_2345m.01                               | PF00400.27;PF09325.5;  | WD40;Vps5;                   | null                                                     | FALSE |
| group_65 | 1 | jgi PosplRSB12_1 1143524 e_gw1.7.1189.1                        | PF08265.6              | YL1_C                        | Ino eighty subunit 6                                     | FALSE |
| group_66 | 1 | jgi Dacsp1 22365 fgenes1_kg.9_#_236_#_isotig09731              | PF03657.8              | UPF0113                      | 60S ribosome subunit biogenesis protein NIP7 homolog     | TRUE  |
| group_67 | 2 | jgi Ustma1 175 UM00175                                         | PF01398.16;PF13012.1;  | JAB;MitMem_reg;              | translation initiation factor 3, subunit f               | FALSE |
| group_68 | 2 | jgi Exova1 291539 estExt_fgenes1_pg.C_2_t10484                 | PF10785.4PF12853.2;    | NADH-u_ox-rdase;NADH_u_ox_C; | NADH-ubiquinone oxidoreductase complex i, 21 kDa subunit | FALSE |
| group_69 | 1 | jgi Lacbi2 480626 fgenes1_pm.LG_2_#_764                        | PF04410.9              | Gar1                         | H/ACA ribonucleoprotein complex subunit 1                | FALSE |
| group_70 | 1 | jgi Cryvi1 295086 estExt_Genewise1Plus.C_150161                | PF03232.8              | COQ7                         | null                                                     | FALSE |
| group_71 | 1 | jgi Spore1 2004 sr15833m.01                                    | PF11708.3              | Slu7                         | RNA splicing factor - Slu7p                              | FALSE |
| group_72 | 1 | jgi Gansp1 113266 fgenes1_kg.1_#_384_#_isotig12156             | PF01217.15             | Clat_adaptor_s               | Protein APS-3                                            | TRUE  |
| group_73 | 2 | jgi Spore1 4326 sr12571m.01                                    | PF01281.14;PF01722.13; | Ribosomal_L9_N;Bola;         | bola-like protein                                        | FALSE |
| group_74 | 1 | jgi Spoli1 197984 gm1.2880_g                                   | PF08241.7              | Methyltransf_11              | S-adenosyl-L-methionine-dependent methyltransferase      | FALSE |
| group_75 | 1 | jgi Hydpi2 179735 estExt_fgenes1_pm.C_30352                    | PF01990.12             | ATP-synt_F                   | vacuolar ATP synthase subunit F                          | FALSE |
| group_76 | 1 | jgi Phlbr1 25049 fgenes1_kg.1_#_593_#_isotig11603              | PF01423.17             | LSM                          | small nuclear ribonucleoprotein G                        | TRUE  |
| group_77 | 2 | jgi Cryne_H99_1 3582 CNAG_03989T0                              | PF07792.7;PF08616.5;   | Afi1;SPA;                    | spindle pole body interacting protein                    | FALSE |
| group_78 | 2 | jgi Tulca1 66641 e_gw1.13.61.1                                 | PF10607.4;PF13445.1;   | CLTH;zf-RING_UBOX;           | null                                                     | FALSE |
| group_79 | 2 | jgi Conpu1 81807 fgenes1_kg.5_#_354_#_isotig03693              | PF06212.7              | GRIM-19                      | NADH-ubiquinone oxidoreductase subunit GRIM-20           | FALSE |
| group_80 | 1 | jgi Dacsp1 94841 estExt_fgenes1_pm.C_90083                     | PF13185.1              | GAF_2                        | null                                                     | FALSE |
| group_81 | 2 | jgi Paxru1 144401 e_gw1.338.20.1                               | PF00168.25;PF00616.14; | C2;RasGAP;                   | null                                                     | FALSE |

|           |   |                                                             |                                   |                                            |                                                            |       |
|-----------|---|-------------------------------------------------------------|-----------------------------------|--------------------------------------------|------------------------------------------------------------|-------|
| group_82  | 1 | jgi Galma1 91339 estExt_Genewise1Plus.C_5_t20004            | PF04733.9                         | Coatomer_E                                 | coatomer subunit                                           | FALSE |
| group_83  | 2 | jgi Malgl1 1661 MGL_1660                                    | PF13855.1;PF00565.12;             | LRR_8;SNase;                               | SNase-domain-containing protein                            | FALSE |
| group_84  | 1 | jgi Hebcy2 63963 e_gw1.3.1137.1                             | PF01423.17                        | LSM                                        | U6 snRNA-associated Sm-like protein LSM8                   | FALSE |
| group_85  | 2 | PTRG_11391                                                  | PF00400.27;PF00106.20;            | WD40;adh_short;                            | null                                                       | FALSE |
| group_86  | 1 | jgi Lacbi2 677520 estExt_fgenes2_kg.C_LG_3_t10262           | PF03604.8                         | DNA_RNApol_7kD                             | DNA-directed RNA polymerases I, II, and III subunit RPABC4 | TRUE  |
| group_87  | 1 | jgi Amath1 71907 fgenes1_kg.498_#_3_#_isotig20761           | PF00076.17                        | RRM_1                                      | translation initiation factor 4B                           | FALSE |
| group_88  | 2 | jgi Sphst1 33023 fgenes1_kg.81_#_78_#_Locus988v1rpkm215.86  | PF02136.15;PF00076.17;            | NTF2;RRM_1;                                | NTF2 and RRM domain-containing protein                     | FALSE |
| group_89  | 1 | jgi Cryne_H99_1 2991 CNAG_03343T0                           | PF01997.11                        | Translin                                   | null                                                       | FALSE |
| group_90  | 3 | jgi Paxin1 179128 estExt_fgenes1_pg.C_50053                 | PF00009.22;PF03144.20;PF03144.21; | GTP_EFTU;GTP_EFTU_D2;GTP_EFTU_D3;          | GTP-binding protein 1                                      | TRUE  |
| group_91  | 1 | jgi PleosPC15_2 1031719 e_gw1.01.1306.1                     | PF00071.17                        | Ras                                        | Small GTP binding protein Rab2                             | TRUE  |
| group_92  | 1 | jgi PleosPC15_2 1111361 estExt_Genemark1.C_030571           | PF05700.6                         | BCAS2                                      | Pre-mRNA-splicing factor SPF27                             | FALSE |
| group_93  | 2 | jgi Saico1 27212 fgenes1_pg.23_#_49                         | PF13649.1;PF12937.2;              | Methyltransf_25;F-box-like;                | null                                                       | FALSE |
| group_94  | 2 | jgi Sporo1 31819 estExt_fgenes1_pg.C_20324                  | PF09830.4;PF00134.18;             | ATP_transf;Cyclin_N;                       | cyclin L1                                                  | FALSE |
| group_95  | 3 | jgi Laesu1 695612 estExt_Genewise1Plus.C_7_t20348           | PF02771.11;PF02770.14;PF00441.19; | Acyl-CoA_dh_N;Acyl-CoA_dh_M;Acyl-CoA_dh_1; | isovaleryl-CoA dehydrogenase                               | FALSE |
| group_96  | 1 | jgi PleosPC15_2 1103189 gm1.4726_g                          | PF05653.9                         | Mg_trans_NIPA                              | duf803 domain membrane protein                             | FALSE |
| group_97  | 2 | jgi Lacbi2 183429 Lacbi1.estExt_GeneWisePlus_human.C_50207  | PF08240.7;PF00107.21;             | ADH_N;ADH_zinc_N;                          | alcohol dehydrogenase                                      | FALSE |
| group_98  | 2 | jgi Suilu1 806651 fgenes1_kg.154_#_4_#_Locus3570v1rpkm46.42 | PF00628.24;PF02373.17;            | PHD;JmjC;                                  | JmjC domain-containing histone demethylation protein       | FALSE |
| group_99  | 2 | jgi Malsy1_1 1529 MSY001_0503m.01                           | PF05347.10;PF00226.26;            | Complex1_LYR;DnaJ;                         | PAB-dependent poly(A) ribonuclease, subunit PAN2           | FALSE |
| group_100 | 1 | jgi Cryne_H99_1 295 CNAG_00355T0                            | PF10159.4                         | MMtag                                      | kinase phosphorylation protein                             | FALSE |
| group_101 | 1 | jgi Lacam1 205024 CE69279_2165                              | PF01027.15                        | Bax1-I                                     | bax Inhibitor family protein                               | FALSE |
| group_102 | 2 | jgi Cryne_JEC21_1 6233 CNI02020.t01                         | PF08513.6;PF05022.7;              | LisH;SRP40_C;                              | SRP40-serine-rich protein                                  | FALSE |



|           |   |                                                             |                                  |                        |                                                      |       |
|-----------|---|-------------------------------------------------------------|----------------------------------|------------------------|------------------------------------------------------|-------|
| group_103 | 1 | jgi Cerun2 169885 CE169884_61                               | PF05916.6                        | Sld5                   | DNA replication complex GINS protein PSF2            | FALSE |
| group_104 | 1 | jgi Hypsu1 108359 gw1.3.390.1                               | PF10153.4                        | DUF2361                | rRNA-processing protein EFG1                         | FALSE |
| group_105 | 1 | jgi Phchr1 4219 fgenesh1_pg.C_scaffold_7000032              | PF08616.5;PF08219.6;             | SPA;TOM13;             | null                                                 | FALSE |
| group_106 | 1 | jgi Hebcy2 221945 CE141685_1629                             | PF03372.18                       | Exo_endo_phos          | ccr4 nocturin family endoribonuclease                | FALSE |
| group_107 | 1 | jgi Hebcy2 439887 fgenesh1_kg.2_#_829_#_Locus743v1rpkm90.53 | PF04716.9                        | ETC_C1_NDUFA5          | NADH dehydrogenase (ubiquinone) 1 alpha subcomplex 5 | FALSE |
| group_108 | 1 | jgi Glotr1_1 119002 estExt_fgenesh1_pg.C_00001_t20199       | PF00642.19                       | zf-CCCH                | zinc finger protein 36, C3H1 type-like 2-A           | TRUE  |
| group_109 | 1 | jgi Diocr1 379101 gm1.3414_g                                | PF00400.27                       | WD40                   | null                                                 | FALSE |
| group_110 | 2 | jgi Malsy1_1 623 MSY001_2455m.01                            | PF10791.4;PF03097.13;            | F1F0-ATPsyn_F;BRO1;    | ATP17-ATP synthase complex, subunit f                | FALSE |
| group_111 | 2 | jgi Hetpy1 192586 CE192585_3110                             | PF00043.20;PF01588.15;           | GST_C;tRNA_bind;       | nucleic acid-binding protein                         | FALSE |
| group_112 | 1 | jgi Dacsp1 25025 fgenesh1_kg.22_#_122_#_isotig07348         | null                             | Sedlin_N               | Trafficking protein particle complex subunit 2       | FALSE |
| group_113 | 3 | jgi Mixos1 91293 fgenesh1_pm.1_#_21                         | PF10168.4;PF03476.11;PF03473.12; | Nup88;MOSC_N;MOSC;     | null                                                 | FALSE |
| group_114 | 2 | jgi Psehu1 4088 PHSY_004557m.01                             | PF00443.24;PF02970.11;           | UCH;TBCA;              | ubiquitin carboxyl-terminal hydrolase                | FALSE |
| group_115 | 1 | jgi Cryne_H99_1 5254 CNAG_05808T0                           | PF10496.4                        | Syntaxin-18_N          | null                                                 | FALSE |
| group_116 | 1 | jgi Dacsp1 20670 fgenesh1_kg.3_#_428_#_isotig09138          | PF02656.10                       | DUF202                 | vacuole non-autophagic-related protein               | FALSE |
| group_117 | 1 | jgi Pismi1 30353 fgenesh1_pm.104_#_11                       | PF00134.18                       | Cyclin_N               | cyclin ctk2                                          | FALSE |
| group_118 | 2 | jgi Ustma1 6250 UM06250                                     | PF13041.1;PF08241.7              | PPR_2;Methyltransf_11; | S-adenosyl-L-methionine-dependent methyltransferase  | FALSE |
| group_119 | 0 | jgi Diocr1 299433 estExt_Genewise1Plus.C_320052             | null                             | null                   | null                                                 | FALSE |
| group_120 | 0 | jgi Cryne_JEC21_1 1929 CNM01490.t01                         | null                             | null                   | null                                                 | FALSE |
| group_121 | 1 | jgi Croqu1 52108 e_gw1.191.41.1                             | PF03908.8                        | Sec20                  | null                                                 | FALSE |
| group_122 | 1 | jgi Lacbi2 478107 fgenesh1_pm.LG_1_#_824                    | PF07093.6                        | SGT1                   | null                                                 | FALSE |
| group_123 | 2 | jgi Amath1 3432 gm1.3432_g                                  | PF13432.1;PF13414.1;             | TPR_16;TPR_11;         | tpr repeat-containing protein                        | FALSE |

|           |   |                                                            |                                           |                                             |                                                        |       |
|-----------|---|------------------------------------------------------------|-------------------------------------------|---------------------------------------------|--------------------------------------------------------|-------|
| group_124 | 3 | jgi Sebve1 190836 CE107186_3945                            | PF10537.4;PF02791.12;PF15612.1;           | WAC_Acf1_DNA_bd;DDT;WHIM1;                  | null                                                   | FALSE |
| group_125 | 1 | jgi Galma1 124680 estExt_Genewise1.C_19_t10227             | PF06229.7                                 | FRG1                                        | protein FRG1                                           | FALSE |
| group_126 | 1 | jgi Glotr1_1 57146 estExt_Genewise1.C_00003_t30332         | PF03372.18                                | Exo_endo_phos                               | skeletal muscle/kidney enriched inositol 5-phosphatase | FALSE |
| group_127 | 4 | jgi Pirin1 73311 mRNA:PIIN_02515                           | PF06148.6;PF12022.3;PF00288.21;PF08544.8; | COG2;DUF3510;GHMP_kinases_N;GHMP_kinases_C; | phosphomevalonate kinase                               | FALSE |
| group_128 | 1 | jgi Hetpy1 271698 fgenes1_kg.2_#_1027_#_comp5857_c0_seq1   | PF05093.8                                 | CIAPIN1                                     | null                                                   | FALSE |
| group_129 | 1 | jgi Agabi_varbisH97_2 191860 estExt_fgenes2_kg.C_40278     | PF00237.14                                | Ribosomal_L22                               | 50S ribosomal protein L22                              | FALSE |
| group_130 | 2 | jgi Rhoba1_1 50840 estExt_Genemark1.C_1_t10476             | PF04129.7;PF01084.15;                     | Vps52;Ribosomal_S18;                        | 37S ribosomal protein                                  | FALSE |
| group_131 | 1 | jgi Cersu1 80754 fgenes1_kg.2_#_823_#_isotig08497          | PF00400.27                                | WD40                                        | null                                                   | FALSE |
| group_132 | 2 | jgi Phlgi1 29570 estExt_fgenes1_pm.C_430015                | PF08567.6;PF03909.12;                     | TFIIH_BTF_p62_N;BSD;                        | transcription factor tfiih complex subunit tfb1        | FALSE |
| group_133 | 2 | jgi Wolco1 99699 estExt_Genewise1Plus.C_4_t20273           | PF13191.1;PF14629.1;                      | AAA_16;ORC4_C;                              | null                                                   | FALSE |
| group_134 | 1 | jgi Agahy1 269994 fgenes1_kg.8_#_22_#_comp3521_c0_seq13    | PF12333.3                                 | Ipi1_N                                      | null                                                   | FALSE |
| group_135 | 2 | jgi Psehu1 2819 PHSY_003495m.01                            | PF03770.11;PF15404.1;                     | IPK;PH_4;                                   | ARG82-dual-specificity inositol polyphosphate kinase   | FALSE |
| group_136 | 2 | jgi Travel1 64856 estExt_fgenes1_pg.C_6_t10208             | PF13639.1;PF15411.1;                      | zf-RING_2;PH_10;                            | von Willebrand RING finger domain-containing protein   | FALSE |
| group_137 | 1 | jgi Cryne_JEC21_1 1406 CNK02770.t01                        | PF09346.5                                 | SMI1_KNR4                                   | null                                                   | FALSE |
| group_138 | 3 | jgi Hetan2 329913 e_gw1.12.1172.1                          | PF00270.24;PF00271.26;PF09382.5;          | DEAD;Helicase_C;RQC;                        | ATP-dependent DNA helicase                             | FALSE |
| group_139 | 1 | jgi Pisti1 138598 e_gw1.20.474.1                           | PF04930.10                                | FUN14                                       | FUN14 domain-containing protein                        | FALSE |
| group_140 | 1 | jgi Paxru1 130720 e_gw1.21.118.1                           | PF00621.15                                | RhoGEF                                      | RhoGEF domain-containing protein                       | FALSE |
| group_141 | 1 | jgi Dacsp1 21457 fgenes1_kg.6_#_132_#_isotig09307          | PF05348.6                                 | UMP1                                        | UMP1 domain-containing protein                         | FALSE |
| group_142 | 1 | jgi Psehu1 3450 PHSY_004128m.01                            | PF05502.8                                 | Dynactin_p62                                | dynactin p62 family protein                            | FALSE |
| group_143 | 2 | jgi Gymlu1 42552 fgenes1_kg.22_#_22_#_Locus5128v1rpkm32.55 | PF00642.19;PF08590.5;                     | zf-CCCH;DUF1771;                            | ccch zinc finger and smr domain protein                | FALSE |
| group_144 | 0 | jgi Ustma1 3540 UM03540                                    | null                                      | null                                        | null                                                   | FALSE |

|           |   |                                                                  |                                  |                              |                                                 |       |
|-----------|---|------------------------------------------------------------------|----------------------------------|------------------------------|-------------------------------------------------|-------|
| group_145 | 2 | jgi Phlgi1 76254 e_gw1.144.52.1                                  | PF13249.1;PF00432.16;            | Prenyltrans_2;Prenyltrans;   | Prenyltrans_2                                   | FALSE |
| group_146 | 1 | jgi Hydpi2 23380 gm1.535_g                                       | PF02291.10                       | TFIID-31kDa                  | transcription initiation factor TFIID subunit 9 | FALSE |
| group_147 | 1 | jgi Sporo1 30937 estExt_fgenesh1_kg.C_50045                      | PF09724.4                        | DUF2036                      | null                                            | FALSE |
| group_148 | 2 | jgi Copci1 11368 CC1G_13817T0                                    | PF04627.8;PF05729.7;             | ATP-synt_Eps;NACHT;          | null                                            | FALSE |
| group_149 | 1 | jgi Neole1 1176338 gm1.2563_g                                    | PF00829.16                       | Ribosomal_L21p               | ribosomal l21 domain-containing protein         | FALSE |
| group_150 | 1 | jgi Hypsu1 37761 fgenesh1_kg.15_#_65_#_Locus5356v1rpkm20.49      | PF03467.10                       | Smg4_UPF3                    | Smg-4/UPF3 family protein                       | FALSE |
| group_151 | 2 | jgi SerlaS7_9_2 1178773 estExt_Genewise1Plus.C_1_t40384          | PF12739.2;PF08626.6;             | TRAPPC-Trs85;TRAPPC9-Trs120; | null                                            | FALSE |
| group_152 | 2 | jgi Tulca1 16570 gm1.125_g                                       | PF00069.20;PF13300.1;            | Pkinase;DUF4078;             | null                                            | FALSE |
| group_153 | 1 | jgi Dacsp1 109871 gm1.6989_g                                     | PF03676.9                        | UPF0183                      | null                                            | FALSE |
| group_154 | 3 | jgi Phlbr1 17106 fgenesh1_pg.4_#_384                             | PF01423.17;PF01369.15;PF15410.1; | LSM;Sec7;PH_9;               | small nuclear ribonucleoprotein sm d2           | FALSE |
| group_155 | 1 | jgi Suilu1 475367 CE363972_2385                                  | PF10294.4                        | Methyltransf_16              | null                                            | FALSE |
| group_156 | 1 | jgi Pilcr1 812622 fgenesh1_kg.00005_#_239_#_Locus2617v1rpkm79.79 | PF05486.7                        | SRP9-21                      | signal recognition particle subunit SRP9        | FALSE |
| group_157 | 1 | jgi Lacam1 671684 fgenesh1_kg.4_#_110_#_Locus1707v1rpkm80.67     | PF01250.12                       | Ribosomal_S6                 | 37s ribosomal protein mrp17                     | FALSE |
| group_158 | 1 | jgi Mixos1 94207 fgenesh1_pm.4_#_580                             | PF00249.26                       | Myb_DNA-binding              | proteophosphoglycan ppg4                        | FALSE |
| group_159 | 2 | jgi Spore1 6304 sr14314m.01                                      | PF00069.20;PF00433.19;           | Pkinase;Pkinase_C;           | serine/threonine protein kinase B-related Ukb1  | FALSE |
| group_160 | 0 | jgi Schco3 2622721 fgenesh1_kg.5_#_2161_#_Locus5259v1rpkm23.65   | Null                             | null                         | null                                            | FALSE |
| group_161 | 1 | jgi Stehi1 161869 gm1.10799_g                                    | PF08495.5                        | FIST                         | null                                            | FALSE |
| group_162 | 0 | jgi Naifl1 237611 estExt_Genewise1Plus.C_950013                  | null                             | null                         | null                                            | FALSE |
| group_163 | 1 | jgi Glotr1_1 69997 estExt_Genewise1Plus.C_00002_t10315           | PF09813.4                        | Coiled-coil_56               | null                                            | FALSE |
| group_164 | 1 | jgi Neole1 1022940 gw1.76.16.1                                   | PF06398.6                        | Pex24p                       | null                                            | FALSE |
| group_165 | 1 | jgi Galma1 233169 fgenesh1_kg.1_#_146_#_Locus1564v1rpkm84.28     | PF12867.2                        | DinB_2                       | null                                            | FALSE |

|           |   |                                                         |                                  |                     |                                                |       |
|-----------|---|---------------------------------------------------------|----------------------------------|---------------------|------------------------------------------------|-------|
| group_166 | 1 | jgi PleosPC9_1 123603 genemark.2921_g                   | PF00398.15                       | RrnaAD              | null                                           | FALSE |
| group_167 | 3 | jgi Agahy1 285598 estExt_fgenesh1_pg.C_320033           | PF14259.1;PF00076.17;PF00658.13; | RRM_6;RRM_1;PABP;   | null                                           | FALSE |
| group_168 | 2 | jgi Rhomi1 210517 estExt_Genemark1.C_4_t10058           | PF06159.8;PF01521.15;            | DUF974;Fe-S_biosyn; | iron-sulfur cluster assembly accessory protein | FALSE |
| group_169 | 1 | jgi Spore1 1331 sr14978m.01                             | PF00169.24                       | PH                  | zinc metalloprotease                           | FALSE |
| group_170 | 1 | jgi Glotr1_1 100173 fgenesh1_kg.00008_#_32_#_Contig3603 | PF09340.5                        | NuA4                | NuA4 domain-containing protein                 | FALSE |
| group_171 | 1 | jgi Boled1 910839 estExt_Genewise1Plus.C_6_t10298       | PF13671.1                        | AAA_33              | null                                           | FALSE |

1 "null" indicates that the best hit does not meet match criteria

**Table S3:** Enrichment analysis of functional categories of 78 gene clusters that have single-copy orthologs in yeast genome

| Category        | Term                               | Count | %        | P-value  | Gene ID <sup>1</sup>                                                                                                                                                                                                                           | List Total | Pop Hits | Pop Total | Fold Enrichment | Bonferroni | Benjamini | FDR             |
|-----------------|------------------------------------|-------|----------|----------|------------------------------------------------------------------------------------------------------------------------------------------------------------------------------------------------------------------------------------------------|------------|----------|-----------|-----------------|------------|-----------|-----------------|
| GOTERM_BP_FAT   | GO:0006364~rRNA processing         | 14    | 17.94872 | 4.97E-05 | S000001131, S000007608, S000005370, S000005091, S000002172, S000003931, S000001492, S000005837, S000006132, S000004898, S000004012, S000005005, S000006138, S000006156                                                                         | 75         | 239      | 4870      | 3.803626        | 0.025213   | 0.025213  | <b>0.071794</b> |
| SP_PIR_KEYWORDS | ribosome biogenesis                | 10    | 12.82051 | 5.92E-05 | S000006132, S000004012, S000001131, S000005005, S000005370, S000006138, S000002172, S000001492, S000003931, S000005837                                                                                                                         | 78         | 148      | 6448      | 5.585586        | 0.007661   | 0.007661  | <b>0.06887</b>  |
| GOTERM_BP_FAT   | GO:0016072~rRNA process metabolic  | 14    | 17.94872 | 7.30E-05 | S000001131, S000007608, S000005370, S000005091, S000002172, S000003931, S000001492, S000005837, S000006132, S000004898, S000004012, S000005005, S000006138, S000006156                                                                         | 75         | 248      | 4870      | 3.665591        | 0.036808   | 0.018577  | 0.105422        |
| GOTERM_BP_FAT   | GO:0006396~RNA processing          | 20    | 25.64103 | 1.70E-04 | S000006382, S000001131, S000003059, S000007608, S000005370, S000005091, S000002172, S000001492, S000003931, S000005837, S000006132, S000004898, S000004012, S000005005, S000006138, S000006156, S000005230, S000006134, S000002965, S000000441 | 75         | 515      | 4870      | 2.521683        | 0.083563   | 0.028669  | 0.245126        |
| GOTERM_BP_FAT   | GO:0042254~ribosome biogenesis     | 16    | 20.51282 | 1.96E-04 | S000001131, S000004064, S000007608, S000005370, S000005091, S000002172, S000001492, S000003931, S000005837, S000006132, S000004898, S000004012, S000004703, S000005005, S000006138, S000006156                                                 | 75         | 351      | 4870      | 2.959924        | 0.096007   | 0.024918  | 0.283474        |
| GOTERM_BP_FAT   | GO:0034660~ncRNA process metabolic | 17    | 21.79487 | 2.04E-04 | S000001131, S000003059, S000004050, S000007608,                                                                                                                                                                                                | 75         | 393      | 4870      | 2.808821        | 0.099485   | 0.02074   | 0.294286        |

|                 |                                                    |    |          |          |                                                                                                                                                                                                                                    |    |      |      |          |          |          |          |  |
|-----------------|----------------------------------------------------|----|----------|----------|------------------------------------------------------------------------------------------------------------------------------------------------------------------------------------------------------------------------------------|----|------|------|----------|----------|----------|----------|--|
|                 |                                                    |    |          |          | S000005370, S000005091,<br>S000002172, S000001492,<br>S000003931, S000005837,<br>S000006132, S000004898,<br>S000004012, S000001053,<br>S000005005, S000006138,<br>S000006156                                                       |    |      |      |          |          |          |          |  |
| GOTERM_BP_FAT   | GO:0022613~ribonucleoprotein<br>complex biogenesis | 17 | 21.79487 | 2.29E-04 | S000001131, S000004064,<br>S000007608, S000005370,<br>S000005091, S000002172,<br>S000001492, S000003931,<br>S000005837, S000006132,<br>S000004898, S000004012,<br>S000004703, S000005005,<br>S000006138, S000006156,<br>S000000441 | 75 | 397  | 4870 | 2.780521 | 0.111166 | 0.019449 | 0.330891 |  |
| GOTERM_BP_FAT   | GO:0034470~ncRNA processing                        | 15 | 19.23077 | 4.18E-04 | S000003059, S000001131,<br>S000007608, S000005370,<br>S000005091, S000002172,<br>S000003931, S000001492,<br>S000005837, S000006132,<br>S000004898, S000004012,<br>S000005005, S000006138,<br>S000006156                            | 75 | 335  | 4870 | 2.907463 | 0.193351 | 0.030229 | 0.602493 |  |
| GOTERM_CC_FAT   | GO:0005730~nucleolus                               | 13 | 16.66667 | 4.19E-04 | S000001131, S000007608,<br>S000005370, S000005091,<br>S000002172, S000001358,<br>S000003931, S000001492,<br>S000005837, S000006132,<br>S000005005, S000006138,<br>S000001185                                                       | 68 | 269  | 4595 | 3.265635 | 0.084237 | 0.084237 | 0.528015 |  |
| GOTERM_CC_FAT   | GO:0030684~preribosome                             | 9  | 11.53846 | 4.77E-04 | S000006132, S000004012,<br>S000005005, S000005370,<br>S000006138, S000002172,<br>S000001492, S000003931,<br>S000005837                                                                                                             | 68 | 128  | 4595 | 4.751264 | 0.095428 | 0.04891  | 0.601567 |  |
| SP_PIR_KEYWORDS | nucleus                                            | 34 | 43.58974 | 5.73E-04 | S000003059, S000001131,<br>S000005217, S000002172,<br>S000003931, S000005837,<br>S000000064, S000006132,<br>S000004898, S000004012,<br>S000003608, S000003567,                                                                     | 78 | 1636 | 6448 | 1.718011 | 0.071758 | 0.036547 | 0.664823 |  |

|               |                                                    |    |          |          |                                                                                                                                                                                                                                                                                                      |    |     |      |          |          |          |          |  |
|---------------|----------------------------------------------------|----|----------|----------|------------------------------------------------------------------------------------------------------------------------------------------------------------------------------------------------------------------------------------------------------------------------------------------------------|----|-----|------|----------|----------|----------|----------|--|
|               |                                                    |    |          |          | S000006156, S000006138,<br>S000001185, S000006134,<br>S000006382, S000005398,<br>S000002699, S000004064,<br>S000007608, S000005370,<br>S000005091, S000001492,<br>S000002165, S000001676,<br>S000005005, S000000853,<br>S000000770, S000005667,<br>S000002965, S000005780,<br>S000006260, S000000441 |    |     |      |          |          |          |          |  |
| GOTERM_CC_FAT | GO:0030687~preribosome, large<br>subunit precursor | 5  | 6.410256 | 0.002543 | S000006132, S000004012,<br>S000005005, S000001492,<br>S000003931                                                                                                                                                                                                                                     | 68 | 40  | 4595 | 8.446691 | 0.414168 | 0.163259 | 3.16581  |  |
| GOTERM_CC_FAT | GO:0070013~intracellular organelle<br>lumen        | 22 | 28.20513 | 0.002768 | S000003036, S000001131,<br>S000006208, S000007608,<br>S000005370, S000005091,<br>S000002172, S000001492,<br>S000001358, S000003931,<br>S000000064, S000005837,<br>S000006132, S000003278,<br>S000001053, S000003608,<br>S000005005, S000006138,<br>S000006156, S000002986,<br>S000001185, S000006260 | 68 | 783 | 4595 | 1.898618 | 0.441257 | 0.135424 | 3.441229 |  |
| GOTERM_CC_FAT | GO:0043233~organelle lumen                         | 22 | 28.20513 | 0.002768 | S000003036, S000001131,<br>S000006208, S000007608,<br>S000005370, S000005091,<br>S000002172, S000001492,<br>S000001358, S000003931,<br>S000000064, S000005837,<br>S000006132, S000003278,<br>S000001053, S000003608,<br>S000005005, S000006138,<br>S000006156, S000002986,<br>S000001185, S000006260 | 68 | 783 | 4595 | 1.898618 | 0.441257 | 0.135424 | 3.441229 |  |
| GOTERM_CC_FAT | GO:0031981~nuclear lumen                           | 17 | 21.79487 | 0.004207 | S000001131, S000007608,<br>S000005370, S000005091,<br>S000002172, S000001492,<br>S000001358, S000003931,<br>S000000064, S000005837,<br>S000006132, S000003608,                                                                                                                                       | 68 | 545 | 4595 | 2.107798 | 0.587442 | 0.162284 | 5.187252 |  |

|                 |                                                      |    |          |          |                                                                                                                                                                                                                                                                                                      |    |      |      |          |          |          |          |
|-----------------|------------------------------------------------------|----|----------|----------|------------------------------------------------------------------------------------------------------------------------------------------------------------------------------------------------------------------------------------------------------------------------------------------------------|----|------|------|----------|----------|----------|----------|
|                 |                                                      |    |          |          | S000005005, S000006138,<br>S000006156, S000001185,<br>S000006260                                                                                                                                                                                                                                     |    |      |      |          |          |          |          |
| GOTERM_MF_FAT   | GO:0003924~GTPase activity                           | 6  | 7.692308 | 0.004878 | S000004529, S000001722,<br>S000004703, S000000368,<br>S000001149, S000006138                                                                                                                                                                                                                         | 68 | 70   | 4190 | 5.281513 | 0.603164 | 0.603164 | 5.891752 |
| SP_PIR_KEYWORDS | mitochondrion inner membrane                         | 8  | 10.25641 | 0.005289 | S000001284, S000003489,<br>S000005456, S000003278,<br>S000004703, S000006225,<br>S000005651, S000002376                                                                                                                                                                                              | 78 | 179  | 6448 | 3.6946   | 0.498088 | 0.205289 | 5.988269 |
| GOTERM_CC_FAT   | GO:0031974~membrane-enclosed lumen                   | 22 | 28.20513 | 0.005416 | S000003036, S000001131,<br>S000006208, S000007608,<br>S000005370, S000005091,<br>S000002172, S000001492,<br>S000001358, S000003931,<br>S000000064, S000005837,<br>S000006132, S000003278,<br>S000001053, S000003608,<br>S000005005, S000006138,<br>S000006156, S000002986,<br>S000001185, S000006260 | 68 | 827  | 4595 | 1.797603 | 0.680343 | 0.173111 | 6.631425 |
| GOTERM_CC_FAT   | GO:0005732~small nucleolar ribonucleoprotein complex | 4  | 5.128205 | 0.009081 | S000001131, S000005091,<br>S000002172, S000005837                                                                                                                                                                                                                                                    | 68 | 30   | 4595 | 9.009804 | 0.852777 | 0.23943  | 10.88648 |
| GOTERM_CC_FAT   | GO:0030529~ribonucleoprotein complex                 | 17 | 21.79487 | 0.009091 | S000006382, S000003036,<br>S000001131, S000005370,<br>S000005091, S000002172,<br>S000001492, S000003931,<br>S000005837, S000006132,<br>S000004012, S000005005,<br>S000006138, S000005230,<br>S000006134, S000002965,<br>S000000441                                                                   | 68 | 590  | 4595 | 1.947034 | 0.853091 | 0.21317  | 10.89793 |
| SP_PIR_KEYWORDS | nucleotide-binding                                   | 17 | 21.79487 | 0.011271 | S000001284, S000004529,<br>S000003059, S000004050,<br>S000002699, S000004624,<br>S000002165, S000003931,<br>S000001053, S000001722,<br>S000004703, S000000368,<br>S000001149, S000006138,<br>S000006156, S000004297,<br>S000000441                                                                   | 78 | 731  | 6448 | 1.922481 | 0.770897 | 0.308157 | 12.3663  |
| GOTERM_CC_FAT   | GO:0043228~non-membrane-bounded                      | 26 | 33.33333 | 0.011948 | S000003036, S000004529,                                                                                                                                                                                                                                                                              | 68 | 1120 | 4595 | 1.568671 | 0.919873 | 0.244564 | 14.08897 |



|                |                                                                                                 |    |          |          |                                                                                                                                                                                                                                                                                                                        |    |      |      |          |          |          |          |  |
|----------------|-------------------------------------------------------------------------------------------------|----|----------|----------|------------------------------------------------------------------------------------------------------------------------------------------------------------------------------------------------------------------------------------------------------------------------------------------------------------------------|----|------|------|----------|----------|----------|----------|--|
|                | organelle                                                                                       |    |          |          | S000001131, S000005318, S000005217, S000002172, S000001358, S000003931, S000005837, S000000064, S000006132, S000003608, S000001149, S000006156, S000006138, S000003567, S000000014, S000001185, S000004362, S000007608, S000005370, S000005091, S000001492, S000005005, S000000770, S000005667                         |    |      |      |          |          |          |          |  |
| GOTERM_CC_FAT  | GO:0043232~intracellular non-membrane-bounded organelle                                         | 26 | 33.33333 | 0.011948 | S000003036, S000004529, S000001131, S000005318, S000005217, S000002172, S000001358, S000003931, S000005837, S000000064, S000006132, S000003608, S000001149, S000006156, S000006138, S000003567, S000000014, S000001185, S000004362, S000007608, S000005370, S000005091, S000001492, S000005005, S000000770, S000005667 | 68 | 1120 | 4595 | 1.568671 | 0.919873 | 0.244564 | 14.08897 |  |
| GOTERM_CC_FAT  | GO:0030532~small nuclear ribonucleoprotein complex                                              | 5  | 6.410256 | 0.01222  | S000006382, S000005091, S000005230, S000002965, S000006134                                                                                                                                                                                                                                                             | 68 | 62   | 4595 | 5.449478 | 0.924375 | 0.227556 | 14.38729 |  |
| GOTERM_BP_FAT  | GO:0000398~nuclear mRNA splicing, via spliceosome                                               | 6  | 7.692308 | 0.017392 | S000006382, S000005091, S000005230, S000002965, S000006134, S000000441                                                                                                                                                                                                                                                 | 75 | 100  | 4870 | 3.896    | 0.999879 | 0.676081 | 22.40251 |  |
| GOTERM_BP_FAT  | GO:0000377~RNA splicing, via transesterification reactions with bulged adenosine as nucleophile | 6  | 7.692308 | 0.018798 | S000006382, S000005091, S000005230, S000002965, S000006134, S000000441                                                                                                                                                                                                                                                 | 75 | 102  | 4870 | 3.819608 | 0.999942 | 0.661696 | 23.9927  |  |
| UP_SEQ_FEATURE | nucleotide phosphate-binding region:GTP                                                         | 5  | 6.410256 | 0.019091 | S000004529, S000001722, S000004703, S000000368, S000001149                                                                                                                                                                                                                                                             | 78 | 86   | 6448 | 4.806202 | 0.977132 | 0.977132 | 21.40008 |  |
| GOTERM_MF_FAT  | GO:0032561~guanyl ribonucleotide binding                                                        | 6  | 7.692308 | 0.020225 | S000004529, S000001722, S000004703, S000000368, S000001149, S000006138                                                                                                                                                                                                                                                 | 68 | 99   | 4190 | 3.734403 | 0.978968 | 0.854977 | 22.40954 |  |
| GOTERM_MF_FAT  | GO:0005525~GTP binding                                                                          | 6  | 7.692308 | 0.020225 | S000004529, S000001722, S000004703, S000000368,                                                                                                                                                                                                                                                                        | 68 | 99   | 4190 | 3.734403 | 0.978968 | 0.854977 | 22.40954 |  |

|                 |                                                                        |    |          |          |                                                                                                                        |    |     |      |          |          |          |          |  |
|-----------------|------------------------------------------------------------------------|----|----------|----------|------------------------------------------------------------------------------------------------------------------------|----|-----|------|----------|----------|----------|----------|--|
|                 |                                                                        |    |          |          | S000001149, S000006138                                                                                                 |    |     |      |          |          |          |          |  |
| GOTERM_MF_FAT   | GO:0019001~guanyl nucleotide binding                                   | 6  | 7.692308 | 0.020225 | S000004529, S000001722, S000004703, S000000368, S000001149, S000006138                                                 | 68 | 99  | 4190 | 3.734403 | 0.978968 | 0.854977 | 22.40954 |  |
| GOTERM_BP_FAT   | GO:0042273~ribosomal large subunit biogenesis                          | 5  | 6.410256 | 0.02219  | S000006132, S000004012, S000004064, S000001492, S000003931                                                             | 75 | 71  | 4870 | 4.57277  | 0.99999  | 0.684449 | 27.70431 |  |
| SP_PIR_KEYWORDS | gtp-binding                                                            | 5  | 6.410256 | 0.023817 | S000004529, S000001722, S000004703, S000000368, S000001149                                                             | 78 | 92  | 6448 | 4.492754 | 0.956442 | 0.465665 | 24.47566 |  |
| GOTERM_BP_FAT   | GO:0000375~RNA splicing, via transesterification reactions             | 6  | 7.692308 | 0.024307 | S000006382, S000005091, S000005230, S000002965, S000006134, S000000441                                                 | 75 | 109 | 4870 | 3.574312 | 0.999997 | 0.683313 | 29.93409 |  |
| SP_PIR_KEYWORDS | rna-binding                                                            | 9  | 11.53846 | 0.025919 | S000006132, S000004898, S000001131, S000005005, S000005091, S000005230, S000002172, S000002965, S000003931             | 78 | 300 | 6448 | 2.48     | 0.967087 | 0.433898 | 26.34797 |  |
| GOTERM_MF_FAT   | GO:0031202~RNA splicing factor activity, transesterification mechanism | 5  | 6.410256 | 0.026037 | S000006382, S000005091, S000002965, S000006134, S000000441                                                             | 68 | 71  | 4190 | 4.339271 | 0.993169 | 0.810259 | 27.93575 |  |
| SP_PIR_KEYWORDS | protein transport                                                      | 10 | 12.82051 | 0.028061 | S000001284, S000003278, S000003561, S000002549, S000001722, S000000136, S000004258, S000000368, S000005780, S000002376 | 78 | 363 | 6448 | 2.277319 | 0.975277 | 0.410557 | 28.21193 |  |
| SP_PIR_KEYWORDS | mrna splicing                                                          | 5  | 6.410256 | 0.035245 | S000006382, S000005091, S000002965, S000006134, S000000441                                                             | 78 | 104 | 6448 | 3.974359 | 0.990577 | 0.44182  | 34.1544  |  |
| SP_PIR_KEYWORDS | rrna processing                                                        | 6  | 7.692308 | 0.037235 | S000001131, S000007608, S000005091, S000006156, S000002172, S000005837                                                 | 78 | 155 | 6448 | 3.2      | 0.992795 | 0.421961 | 35.71887 |  |
| GOTERM_CC_FAT   | GO:0005743~mitochondrial inner membrane                                | 8  | 10.25641 | 0.037306 | S000001284, S000003489, S000005456, S000003278, S000004703, S000006225, S000005651, S000002376                         | 68 | 217 | 4595 | 2.49119  | 0.999659 | 0.516081 | 38.14313 |  |
| GOTERM_MF_FAT   | GO:0008026~ATP-dependent helicase activity                             | 5  | 6.410256 | 0.044365 | S000002699, S000006156, S000003931, S000005667, S000000441                                                             | 68 | 84  | 4190 | 3.667717 | 0.999812 | 0.882837 | 43.07955 |  |
| GOTERM_MF_FAT   | GO:0070035~purine NTP-dependent helicase activity                      | 5  | 6.410256 | 0.044365 | S000002699, S000006156, S000003931, S000005667,                                                                        | 68 | 84  | 4190 | 3.667717 | 0.999812 | 0.882837 | 43.07955 |  |

|                 |                                                              |    |          |          |                                                                                                                                                                                    |    |     |      |          |          |          |          |  |
|-----------------|--------------------------------------------------------------|----|----------|----------|------------------------------------------------------------------------------------------------------------------------------------------------------------------------------------|----|-----|------|----------|----------|----------|----------|--|
|                 |                                                              |    |          |          | S000000441                                                                                                                                                                         |    |     |      |          |          |          |          |  |
| GOTERM_CC_FAT   | GO:0019866~organelle inner membrane                          | 8  | 10.25641 | 0.045841 | S000001284, S000003489, S000005456, S000003278, S000004703, S000006225, S000005651, S000002376                                                                                     | 68 | 227 | 4595 | 2.381446 | 0.999947 | 0.560088 | 44.7249  |  |
| KEGG_PATHWAY    | sce03040:Spliceosome                                         | 4  | 5.128205 | 0.05147  | S000006382, S000005091, S000002965, S000000441                                                                                                                                     | 21 | 62  | 1439 | 4.420891 | 0.592741 | 0.592741 | 31.7914  |  |
| GOTERM_BP_FAT   | GO:0008380~RNA splicing                                      | 6  | 7.692308 | 0.063684 | S000006382, S000005091, S000005230, S000002965, S000006134, S000000441                                                                                                             | 75 | 142 | 4870 | 2.743662 | 1        | 0.940305 | 61.37428 |  |
| KEGG_PATHWAY    | sce00130:Ubiquinone and other terpenoid-quinone biosynthesis | 2  | 2.564103 | 0.067679 | S000005456, S000005651                                                                                                                                                             | 21 | 5   | 1439 | 27.40952 | 0.696183 | 0.448804 | 39.79429 |  |
| GOTERM_BP_FAT   | GO:0006605~protein targeting                                 | 8  | 10.25641 | 0.06937  | S000001284, S000003278, S000002549, S000001722, S000000368, S000005780, S000002376, S000005837                                                                                     | 75 | 239 | 4870 | 2.173501 | 1        | 0.941723 | 64.63018 |  |
| GOTERM_CC_FAT   | GO:0031428~box C/D snoRNP complex                            | 2  | 2.564103 | 0.07084  | S000002172, S000005837                                                                                                                                                             | 68 | 5   | 4595 | 27.02941 | 1        | 0.694832 | 60.47663 |  |
| GOTERM_CC_FAT   | GO:0046540~U4/U6 x U5 tri-snRNP complex                      | 3  | 3.846154 | 0.074298 | S000006382, S000005091, S000002965                                                                                                                                                 | 68 | 31  | 4595 | 6.539374 | 1        | 0.685901 | 62.29547 |  |
| GOTERM_MF_FAT   | GO:0008565~protein transporter activity                      | 4  | 5.128205 | 0.078762 | S000001284, S000003561, S000005780, S000002376                                                                                                                                     | 68 | 63  | 4190 | 3.912232 | 1        | 0.954996 | 63.89436 |  |
| GOTERM_BP_FAT   | GO:0033365~protein localization in organelle                 | 6  | 7.692308 | 0.080181 | S000001284, S000003278, S000005780, S000002376, S000005837, S000001676                                                                                                             | 75 | 152 | 4870 | 2.563158 | 1        | 0.95351  | 70.12767 |  |
| SP_PIR_KEYWORDS | transport                                                    | 15 | 19.23077 | 0.081224 | S000001284, S000003561, S000002549, S000000136, S000006208, S000004258, S000003801, S000003489, S000003278, S000001722, S000000368, S000006225, S000003252, S000005780, S000002376 | 78 | 788 | 6448 | 1.573604 | 0.999984 | 0.667553 | 62.71315 |  |
| GOTERM_BP_FAT   | GO:0042255~ribosome assembly                                 | 4  | 5.128205 | 0.086686 | S000006132, S000004703, S000006138, S000003931                                                                                                                                     | 75 | 69  | 4870 | 3.764251 | 1        | 0.955272 | 73.04067 |  |
| SP_PIR_KEYWORDS | helicase                                                     | 4  | 5.128205 | 0.087509 | S000002699, S000006156, S000003931, S000000441                                                                                                                                     | 78 | 88  | 6448 | 3.757576 | 0.999993 | 0.661177 | 65.57765 |  |
| GOTERM_MF_FAT   | GO:0004386~helicase activity                                 | 5  | 6.410256 | 0.088344 | S000002699, S000006156, S000003931, S000005667, S000000441                                                                                                                         | 68 | 106 | 4190 | 2.906493 | 1        | 0.945715 | 68.29046 |  |
| UP_SEQ_FEATURE  | nucleotide phosphate-binding                                 | 9  | 11.53846 | 0.089165 | S000001284, S000001053,                                                                                                                                                            | 78 | 387 | 6448 | 1.922481 | 1        | 0.999894 | 68.86134 |  |

|                 |                                             |    |          |          |                                                                                                                                    |    |     |      |          |          |          |          |
|-----------------|---------------------------------------------|----|----------|----------|------------------------------------------------------------------------------------------------------------------------------------|----|-----|------|----------|----------|----------|----------|
|                 | region:ATP                                  |    |          |          | S000003059, S000002699,<br>S000006156, S000006138,<br>S000002165, S000003931,<br>S000000441                                        |    |     |      |          |          |          |          |
| SP_PIR_KEYWORDS | ubiquinone biosynthesis                     | 2  | 2.564103 | 0.091682 | S000005456, S000005651                                                                                                             | 78 | 8   | 6448 | 20.66667 | 0.999996 | 0.647161 | 67.36687 |
| GOTERM_BP_FAT   | GO:0034613~cellular<br>localization protein | 10 | 12.82051 | 0.095813 | S000001284, S000003278,<br>S000003561, S000002549,<br>S000001722, S000000368,<br>S000005780, S000002376,<br>S000005837, S000001676 | 75 | 362 | 4870 | 1.793738 | 1        | 0.960664 | 76.68396 |
| GOTERM_CC_FAT   | GO:0044452~nucleolar part                   | 4  | 5.128205 | 0.098358 | S000001131, S000002172,<br>S000001185, S000005837                                                                                  | 68 | 76  | 4595 | 3.556502 | 1        | 0.765319 | 72.96675 |

1 Gene IDs are from DAIVD website *Saccharomyces cerevisiae* gene set

**Table S4:** Approximately Unbiased (AU) test of the three topologies

| <b>Topology</b>                 | <b>Log-likelihood of RAxML</b> | <b>Difference<sup>1</sup></b> | <b><i>P</i>-value of AU test</b> |
|---------------------------------|--------------------------------|-------------------------------|----------------------------------|
| (((Ag,Pu),Us),Out) <sup>2</sup> | -2063178.2                     | (best)                        | 0.790                            |
| (((Ag,Us),Pu),Out)              | -2063207.1                     | 28.9                          | 0.219                            |
| ((Ag,(Pu,Us)),Out)              | -2063268.1                     | 89.9                          | 0.001                            |

1 Difference between likelihood at this row and the best likelihood

2 Ag: Agaricomycotina; Pu: Pucciniomycotina; Us: Ustilaginomycotina; Out; Outgroup

**Table S5:** Other tests of the three topologies using CONSEL package

| Topology                        | Log-likelihood of RAxML | Difference <sup>1</sup> | P-values  |                                |                         |                          |                                  |                                     |
|---------------------------------|-------------------------|-------------------------|-----------|--------------------------------|-------------------------|--------------------------|----------------------------------|-------------------------------------|
|                                 |                         |                         | Bootstrap | Bayesian Posterior Probability | Kishino - Hasegawa Test | Shimodaira-Hasegawa Test | Weighted Kishino - Hasegawa Test | Weighted Shimodaira - Hasegawa Test |
| (((Ag,Pu),Us),Out) <sup>2</sup> | -2063178.2              | (best)                  | 0.798     | 1.000                          | 0.803                   | 0.905                    | 0.803                            | 0.897                               |
| (((Ag,Us),Pu),Out)              | -2063207.1              | 28.9                    | 0.202     | 3e-13                          | 0.197                   | 0.286                    | 0.197                            | 0.310                               |
| ((Ag,(Pu,Us)),Out)              | -2063268.1              | 89.9                    | 3e-04     | 9e-40                          | 0.002                   | 0.003                    | 0.002                            | 0.004                               |

1 Difference between likelihood at this row and the best likelihood

2 Ag: Agaricomycotina; Pu: Pucciniomycotina; Us: Ustilaginomycotina; Out; Outgroup

**Table S6:** Gene cluster removal in the evaluation of potential sequence bias

| Sequence bias type                            | Cases of gene cluster removal | # of gene clusters discarded |
|-----------------------------------------------|-------------------------------|------------------------------|
| Long branch attraction                        | a                             | 31                           |
|                                               | b                             | 8                            |
|                                               | c                             | 8                            |
|                                               | d                             | 10                           |
| Mutaional saturation                          | e                             | 13                           |
|                                               | f                             | 4                            |
|                                               | g                             | 30                           |
|                                               | h                             | 13                           |
|                                               | i                             | 32                           |
| Long branch attraction + Mutaional saturation | j                             | 55                           |

a. Mean value of upper quartile of LB score > 60

b. Mean value of upper quartile of LB score > 70

c. Standard deviation of LB score > 50

d. Mean value of upper quartile of LB score > 70 or standard deviation of LB score > 50

e. Slope of the linear regression < 0.1

f.  $R^2$  of the linear regression < 0.3

g.  $R^2$  of the linear regression < 0.65

h. Slope of the linear regression < 0.1 or  $R^2$  of the linear regression < 0.3

i. Slope of the linear regression < 0.1 or  $R^2$  of the linear regression < 0.65

j. Mean value of upper quartile of LB score > 60 or Slope of the linear regression < 0.1 or  $R^2$  of the linear regression < 0.65

**Table S7:** Stability analysis of CVTree

| Percentage of gene retained in the random gene set | Topology of the three subphyla        |
|----------------------------------------------------|---------------------------------------|
| 60                                                 | (((Ag,Pu)90,Us)100),Out) <sup>1</sup> |
| 65                                                 | (((Ag,Pu)94,Us)100),Out)              |
| 70                                                 | (((Ag,Pu)95,Us)100),Out)              |
| 75                                                 | (((Ag,Pu)100,Us)100),Out)             |
| 80                                                 | (((Ag,Pu)97,Us)100),Out)              |
| 85                                                 | (((Ag,Pu)99,Us)100),Out)              |
| 90                                                 | (((Ag,Pu)99,Us)100),Out)              |
| 95                                                 | (((Ag,Pu)100,Us)100),Out)             |

<sup>1</sup> Ag: Agaricomycotina; Pu: Pucciniomycotina; Us: Ustilaginomycotina; Out; Outgroup
